# Supplementary material for: Not1 mediates recruitment of the deadenylase Caf1 to mRNAs targeted for degradation by tristetraprolin
Source: PubMed Central journal article supplement — Nucleic Acids Res. 2011 Jan 29;39(10):4373–86. doi: 10.1093/nar/gkr011 (PMC3105394; doi:10.1093/nar/gkr011), 2011-01-29
Supplement: supp_gkr011_nar-01971-a-2010-File009.pdf [file supp_gkr011_nar-01971-a-2010-File009.pdf]

**Supplemental Table S1. DNA Oligonucleotides**

| <b>Name</b> | <b>Sequence (from 5' to 3')</b>         |
|-------------|-----------------------------------------|
| G37         | AATTGAATTCGGATCCCTAAGTCCAAC             |
| G38         | AATTGAATTCAGATCTCCCACTAGACAGC           |
| G83         | TTACAAAGTCACTCAGGATG                    |
| G1000       | GTGCATCTGTCCAGTG                        |
| G1001       | GCCGATTTAGGTGACACTATAGAATACCCTGAAGTTCTC |
| G1009       | GCCGATTTAGGTGACACTATAGAATACTTAGCGTCTTCG |
| G1050       | ATATGGTACCTCCACCATGGGCACCCCCGCAG        |
| G1051       | TTAAGGATCCCGGCTCGCGCTG                  |
| G1052       | ATATGAATTCAATGGATCTCTCTG                |
| G1053       | TTAACTCGAGCTACAGATCCTCTTCTG             |
| G1120       | ATTACTCGAGGCCGAGCAGAAGC                 |
| G1121       | ATATGTCGACCTATTCAGTGACAG                |
| G1576       | GGAGGCCATGGAAGACGGTGAAAT                |
| G1577       | CCAAATCCTCCTCGGCCTCCTCTA                |
| G1578       | TAACATTGCTCCCCGGATTCTCAC                |
| G1579       | AGGTTGTAGCGATTCCCAGGTTCA                |
| G1653       | ATTAGGATCCCCTCCCATCACA                  |
| G1654       | TAATCTCGAGCTATTGCTTCATGGG               |

**Supplemental Table S2. Proteins identified by mass spectrometry in GS-TTP purification**

| Symbol    | Protein                                             | kDa | GeneID | Peptide coverage (%) | Peptide No GS | Peptide No GS-TTP |
|-----------|-----------------------------------------------------|-----|--------|----------------------|---------------|-------------------|
| ACACB     | acetyl-CoA carboxylase 2                            | 277 | 32     | 9                    | 0             | 7                 |
| CNOT1     | CCR4-NOT complex subunit 1                          | 267 | 23019  | 9                    | 0             | 19                |
| CPM       | carboxypeptidase M                                  | 51  | 1368   | 25                   | 0             | 11                |
| ECH1      | enoyl CoA hydratase 1, peroxysomal                  | 36  | 1891   | 14                   | 0             | 5                 |
| ELAVL1    | RNA binding protein HuR                             | 36  | 1994   | 10                   | 0             | 3                 |
| EMD       | emerin, nuclear lamina associated                   | 29  | 2010   | 4                    | 1             | 4                 |
| ENO1      | enolase 1, alpha                                    | 47  | 2023   | 6                    | 0             | 3                 |
| GIGYF1    | GRB10 interacting GYF protein 1                     | 115 | 64599  | 4                    | 0             | 3                 |
| HIST1H1D  | Histone H1.3                                        | 22  | 3007   | 15                   | 0             | 3                 |
| HIST1H2BC | Histone H2B.1                                       | 14  | 8347   | 6                    | 1             | 5                 |
| HIST3H3   | Histone H3t                                         | 16  | 8290   | 5                    | 1             | 4                 |
| HNRNPH2   | RNA binding protein hnRNP H2                        | 49  | 3188   | 11                   | 0             | 4                 |
| HNRNPA2B1 | RNA binding protein hnRNP A2/B1                     | 37  | 3181   | 10                   | 0             | 3                 |
| HNRPC     | RNA binding protein hnRNP C1/C2                     | 34  | 3183   | 36                   | 0             | 12                |
| HNRNPUL1  | RNA binding protein hnRNP U-like 1                  | 96  | 11100  | 13                   | 0             | 9                 |
| IGF2BP3   | Insulin-like growth factor 2 mRNA binding protein 3 | 64  | 10643  | 13                   | 0             | 7                 |
| MOV10     | RNA helicase MOV10                                  | 114 | 4343   | 6                    | 0             | 6                 |

**Supplemental Table S2 (continued). Proteins identified by mass spectrometry in GS-TTP purification**

| Symbol | Protein                                        | kDa | GeneID | Peptide coverage (%) | Peptide No GS | Peptide No GS-TTP |
|--------|------------------------------------------------|-----|--------|----------------------|---------------|-------------------|
| MRPL15 | 39S ribosomal protein L15, mitochondrial       | 33  | 29088  | 10                   | 0             | 3                 |
| MRPL38 | 39S ribosomal protein L38, mitochondrial       | 45  | 6497   | 7                    | 0             | 3                 |
| NCBP2  | nuclear cap-binding protein subunit 2          | 18  | 22916  | 21                   | 0             | 4                 |
| PABPC1 | poly(A) binding protein, cytoplasmic 1         | 71  | 26986  | 16                   | 0             | 9                 |
| PLOD1  | procollagen lysyl hydroxylase                  | 84  | 5351   | 29                   | 0             | 18                |
| RALY   | RNA binding protein Raly                       | 32  | 22913  | 21                   | 0             | 5                 |
| RPS9   | 40S ribosomal protein S9                       | 23  | 6203   | 13                   | 0             | 3                 |
| SRRM2  | RNA binding protein and splicing factor SRm300 | 300 | 23524  | 1                    | 0             | 3                 |
| YBX1   | Y-box binding protein YB1                      | 36  | 4904   | 13                   | 0             | 3                 |
| YWHAB  | 14-3-3 protein beta                            | 28  | 7529   | 39                   | 0             | 5 (11)*           |
| YWHAE  | 14-3-3 protein epsilon                         | 29  | 7531   | 44                   | 1             | 15                |
| YWHAH  | 14-3-3 protein eta                             | 28  | 7533   | 26                   | 0             | 2 (7)*            |
| YWHAG  | 14-3-3 protein gamma                           | 28  | 7532   | 40                   | 0             | 10 (13)*          |
| YWHAZ  | 14-3-3 protein zeta                            | 28  | 7534   | 35                   | 0             | 3 (9)*            |
| Zfp36  | tristetraprolin                                | 34  | 22695  | 33                   | 0             | 12                |

\* No of peptides that are not unique to the isoform are given in parentheses

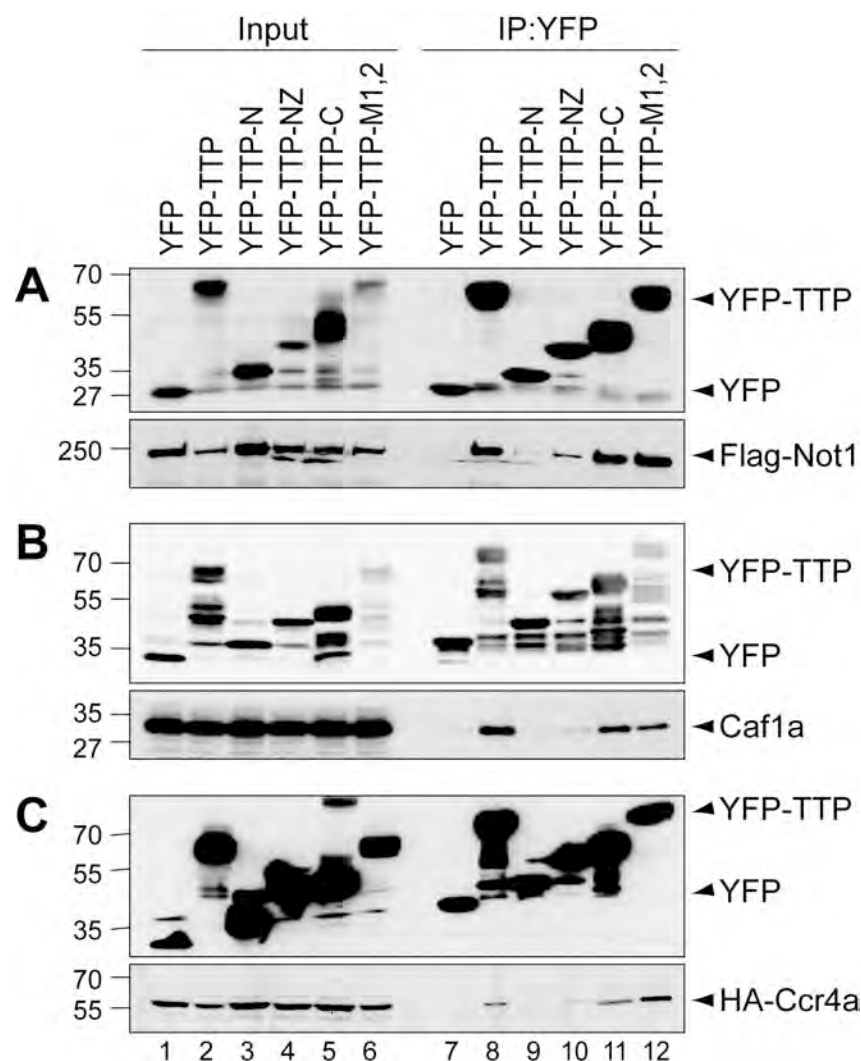

**Supplemental Figure S1.** The C-terminal domain of TTP associates with Not1, Caf1a and Ccr4. **(A)** HEK293 cells were transiently transfected with YFP-tagged TTP constructs as indicated together with Flag-Not1. Cytoplasmic lysates (input) were prepared after 24 hours for immunoprecipitation (IP) with GFP-binder. Western blot analysis was carried out with antibodies against YFP and Flag. **(B)** Transfection and IP were carried out as above. Antibodies against YFP and endogenous Caf1a were used for Western blot analysis. **(C)** HEK293 cells were transiently transfected with YFP-tagged TTP constructs and HA-Ccr4a, and processed as above. Western blot analysis was carried out with antibodies against YFP and HA.
